# Supplementary material
Source: publisher figshare collection journal article supplement (https://tandf.figshare.com/articles/dataset/_/4225427)
Supplement: Supplementary file 1 [file 1]

## Supplementary Methods

### NMR spectroscopy

NMR measurements were carried out on a Bruker 700 MHz Avance III spectrometer. All measurements were performed at 298 K. 1D  $^1\text{H}$ -spectra were acquired with 256 scans and processed using the program TopSpin Version 3.2.

For NMR experiments the samples were prepared by dissolving the peptides in 95%  $\text{H}_2\text{O}$ /5%  $\text{D}_2\text{O}$  with DSS reference, the pH was adjusted to 7.0 in buffer containing 25 mM  $\text{NaH}_2\text{PO}_4$  and  $\text{Na}_2\text{HPO}_4$ . For NMR measurements, the concentration of the RreB and RreR peptides was 0.2 mM and 2 mM, respectively.

### CD spectroscopy

All measurements were carried out with a Jasco J-810 CD spectropolarimeter in a cuvette with a path length of 10mm. The scanning speed was 50 nm/min, bandwidth 1 nm, and a response time of 1 s. Every spectrum was baseline corrected with the corresponding buffer mixture.

In each experiment, measurements were done at 20 °C and 3 spectra were summed and averaged. Peptide samples had a concentration of 200  $\mu\text{M}$  in different buffers (Table 1). All spectra were later smoothened and plotted using Origin (version 8).

Buffers, which were used for CD spectroscopy ( $\text{NaPi}$ ,  $\text{NaH}_2\text{PO}_4$  and  $\text{Na}_2\text{HPO}_4$ ):

rreB

| Buffer       | pH  |
|--------------|-----|
| 25mM NaPi    | 7   |
| 25mM NaPi    | 8,5 |
| 25mM Tris    | 7   |
| 25mM Tris    | 8   |
| 25mM Tris    | 9   |
| 25mM BisTris | 9,5 |

rreR

| Buffer       | pH  |
|--------------|-----|
| 25mM NaPi    | 7   |
| 25mM NaPi    | 8,5 |
| 25mM Tris    | 9   |
| 25mM BisTris | 9,5 |
